# Supplementary material for: Differences in virulence gene expression between human blood and stool Campylobacter coli clade 1 ST828CC isolates
Source: Springer Nature journal article supplement (doi:10.1186/s13099-019-0322-9), 2019-08-01

Figure S1

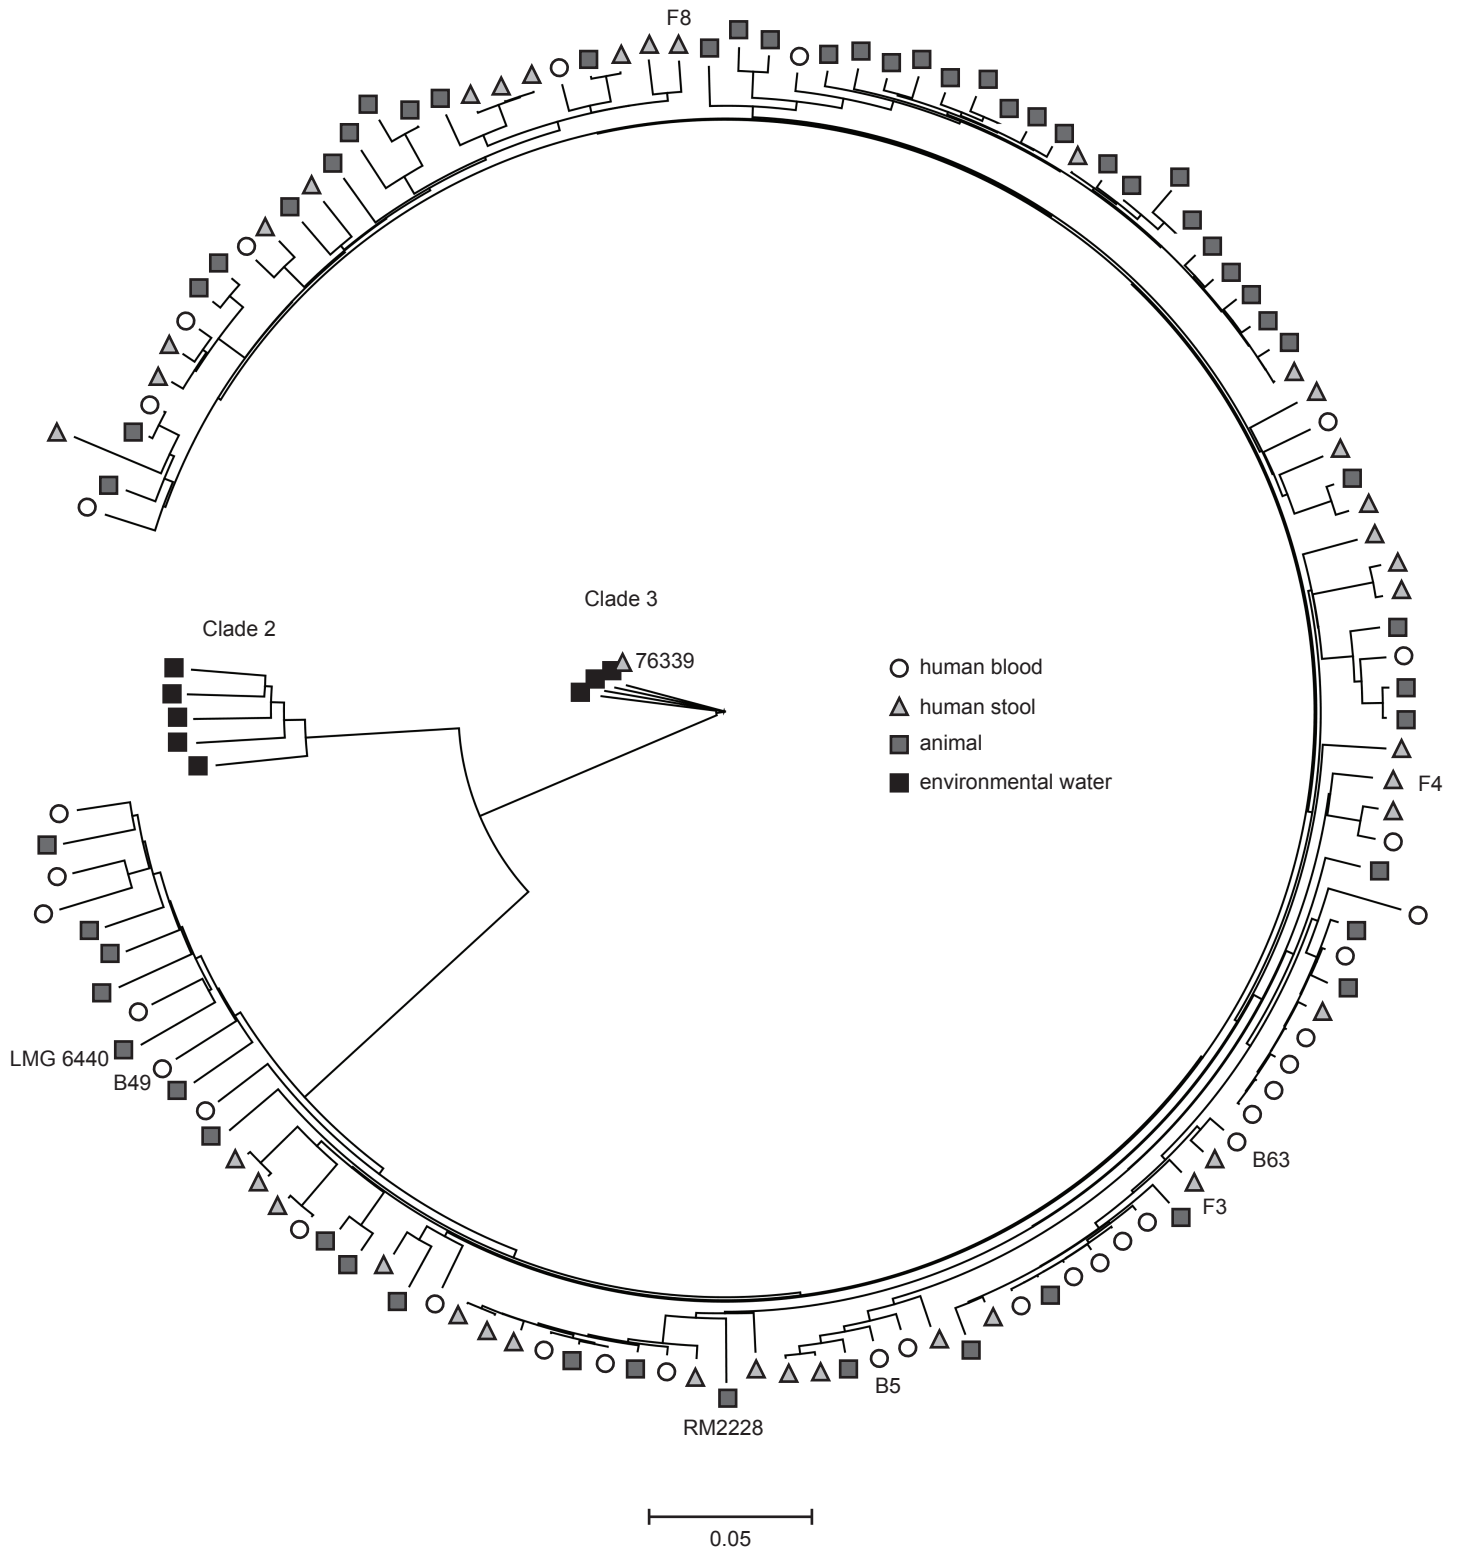

Supplement: MOESM2 [file 17031094]
